# Supplementary material for: Ultrasensitive fluorometric oligonucleotide immunoassay for the simultaneous and efficient detection of two mycotoxins in agricultural products
Source: Royal Society of Chemistry journal article supplement (doi:10.1039/d2ay00367h), 2022-01-01
Supplement: d2ay00367h1.pdf [file d2ay00367h1.pdf]

## Supplementary Information

- 1
- 2 **Fig. S1.** The image of TEM for the MNP.
- 3 **Fig. S2.** The image of TEM for the AuNP (A) and the UV/vis spectra for the complexes of mAb-
- 4 AuNP (B).
- 5 **Fig. S3.** The results of interference between the probes.
- 6 **Fig. S4.** The correlation of the positive results between the UFOIA and LC-MS/MS.
- 7 **Table S1** The optimal of working concentration for detecting ZEN in the UFOIA.
- 8 **Table S2** The optimal of working concentration for detecting AFB<sub>1</sub> in the UFOIA.

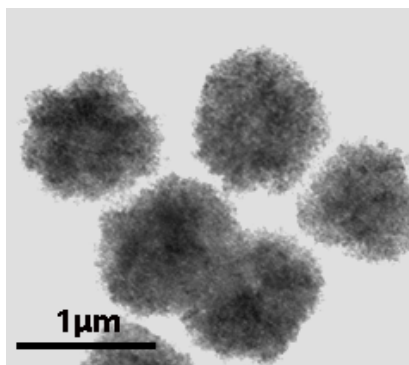

**Fig. S1.** The image of TEM for the MNP.

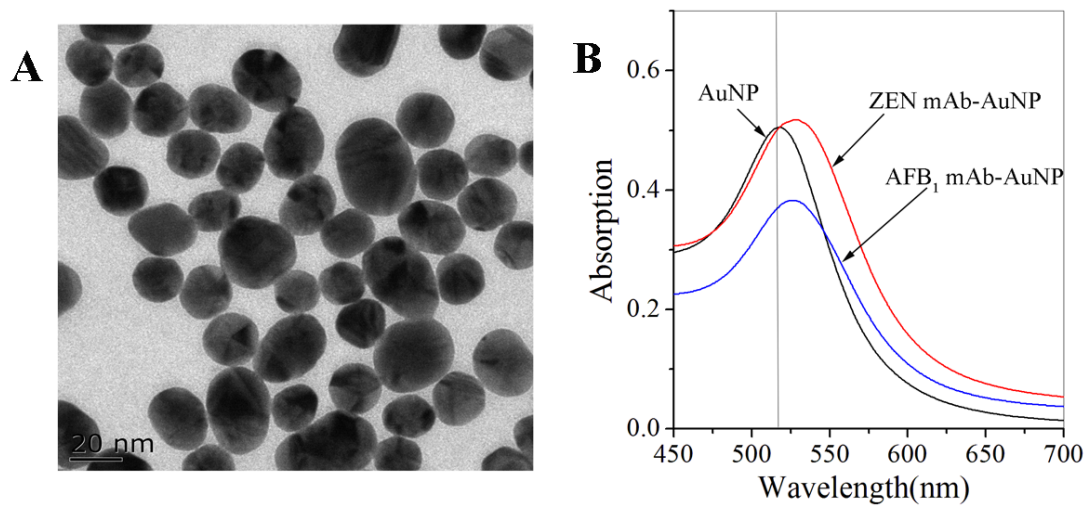

**Fig. S2.** The image of TEM for the AuNP (A) and the UV/vis spectra for the complexes of mAb-AuNP (B).

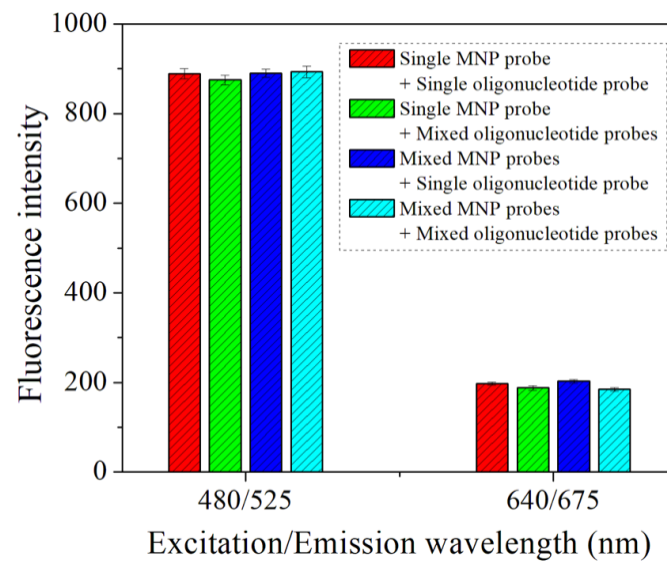

**Fig. S3.** The results of interference between the probes.

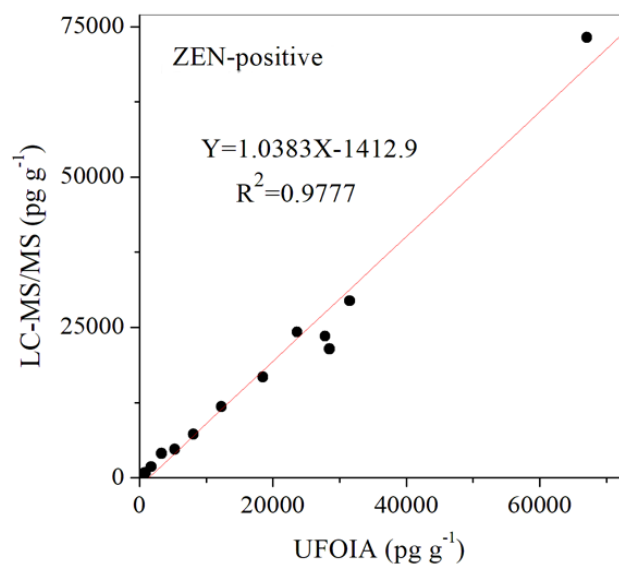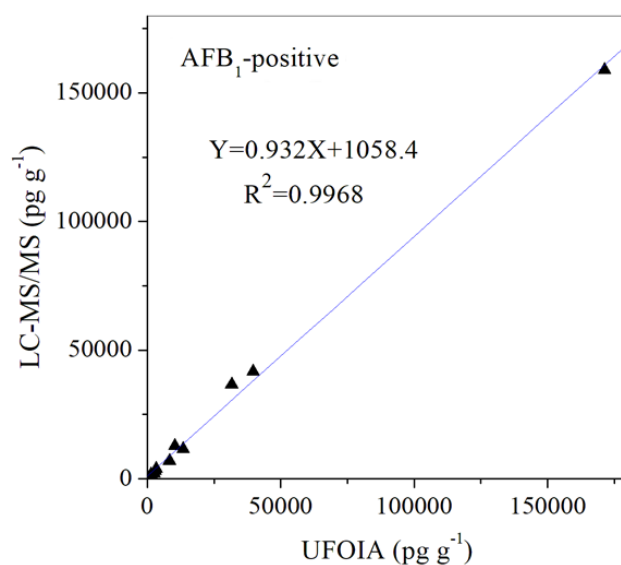

**Fig. S4.** The correlation of the positive results between the UFOIA and LC-MS/MS.

22      **Table S1** The optimal of working concentration for detecting ZEN in the UFOIA.

| MNP probe<br>for ZEN | Fluorometric oligonucleotide probes for ZEN |              |        |                                  |             |      |
|----------------------|---------------------------------------------|--------------|--------|----------------------------------|-------------|------|
|                      | IC <sub>50</sub>                            |              |        | F <sub>0</sub> /IC <sub>50</sub> |             |      |
|                      | 1:2                                         | 1:5          | 1:10   | 1:2                              | 1:5         | 1:10 |
| 1:100                | 73.92                                       | 58.43        | 49.76  | 5.33                             | 6.13        | 6.39 |
| 1:500                | 93.02                                       | <b>49.72</b> | 69.43  | 3.47                             | <b>8.02</b> | 4.45 |
| 1:1000               | 88.43                                       | 106.84       | 129.74 | 4.18                             | 3.20        | 2.61 |
| 1:2000               | 123.64                                      | 174.39       | 110.43 | 2.98                             | 1.97        | 3.41 |

23

25                      **Table S2** The optimal of working concentration for detecting AFB<sub>1</sub> in the UFOIA.

| MNP probe<br>for AFB <sub>1</sub> | Fluorometric oligonucleotide probes for AFB <sub>1</sub> |              |        |                                  |              |      |
|-----------------------------------|----------------------------------------------------------|--------------|--------|----------------------------------|--------------|------|
|                                   | IC <sub>50</sub>                                         |              |        | F <sub>0</sub> /IC <sub>50</sub> |              |      |
|                                   | 1:5                                                      | 1:10         | 1:20   | 1:5                              | 1:10         | 1:20 |
| 1:100                             | 64.29                                                    | 79.65        | 64.93  | 10.08                            | 6.53         | 9.89 |
| 1:500                             | 59.03                                                    | <b>29.65</b> | 96.73  | 8.44                             | <b>21.89</b> | 5.56 |
| 1:1000                            | 97.30                                                    | 77.93        | 105.84 | 5.53                             | 8.20         | 5.28 |
| 1:2000                            | 204.72                                                   | 132.84       | 173.63 | 3.08                             | 4.44         | 2.78 |

26
